# Supplementary material for: A novel PHD-finger protein 14/KIF4A complex overexpressed in lung cancer is involved in cell mitosis regulation and tumorigenesis
Source: PubMed Central journal article supplement (PMC5386714; doi:10.18632/oncotarget.14962), 2017-02-01
Supplement: oncotarget-08-19684-s001.pdf [file oncotarget-08-19684-s001.pdf]

## **A novel PHD-finger protein 14/KIF4A complex overexpressed in lung cancer is involved in cell mitosis regulation and tumorigenesis**

### **SUPPLEMENTARY DATA**

### **SUPPLEMENTARY METHODS**

#### ***In vitro* binding assay**

GST-PHF14 (N-terminal 1-160 a.a) and GST were purified from BL21 bacteria and eluted from glutathione-Sepharose 4B beads (GE Healthcare, UK) as suggested by

the manufacturer. For binding assays, pEGFP-C1 KIF4A full length was incubated with equivalent amounts of GST or GST-PHF14 (N-terminal 1-160 a.a) fusion proteins. After incubation, bead-bound proteins were separated by SDS-PAGE and analyzed by western blotting.



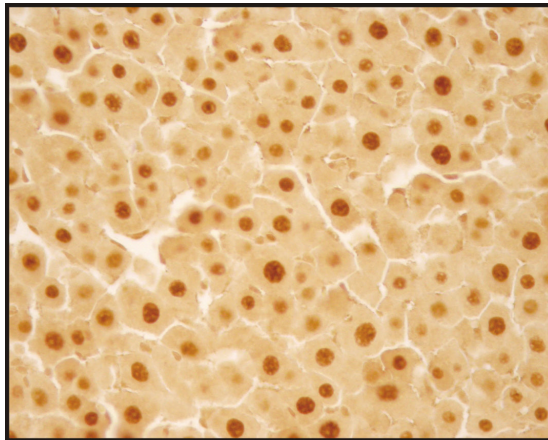

**- Antigen**

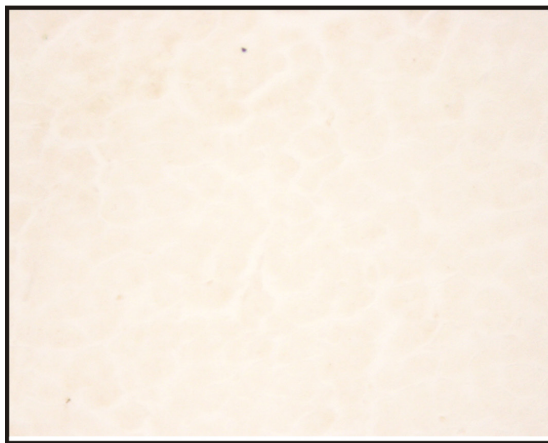

**+ Antigen**

**Supplementary Figure 2: The specificity of the PHF14 polyclonal antibody.** Immunohistochemical analysis of mouse liver showing PHF14 expression using the anti-PHF14 polyclonal antibody without (upper) or with (bottom) pre-incubation with the antigen.

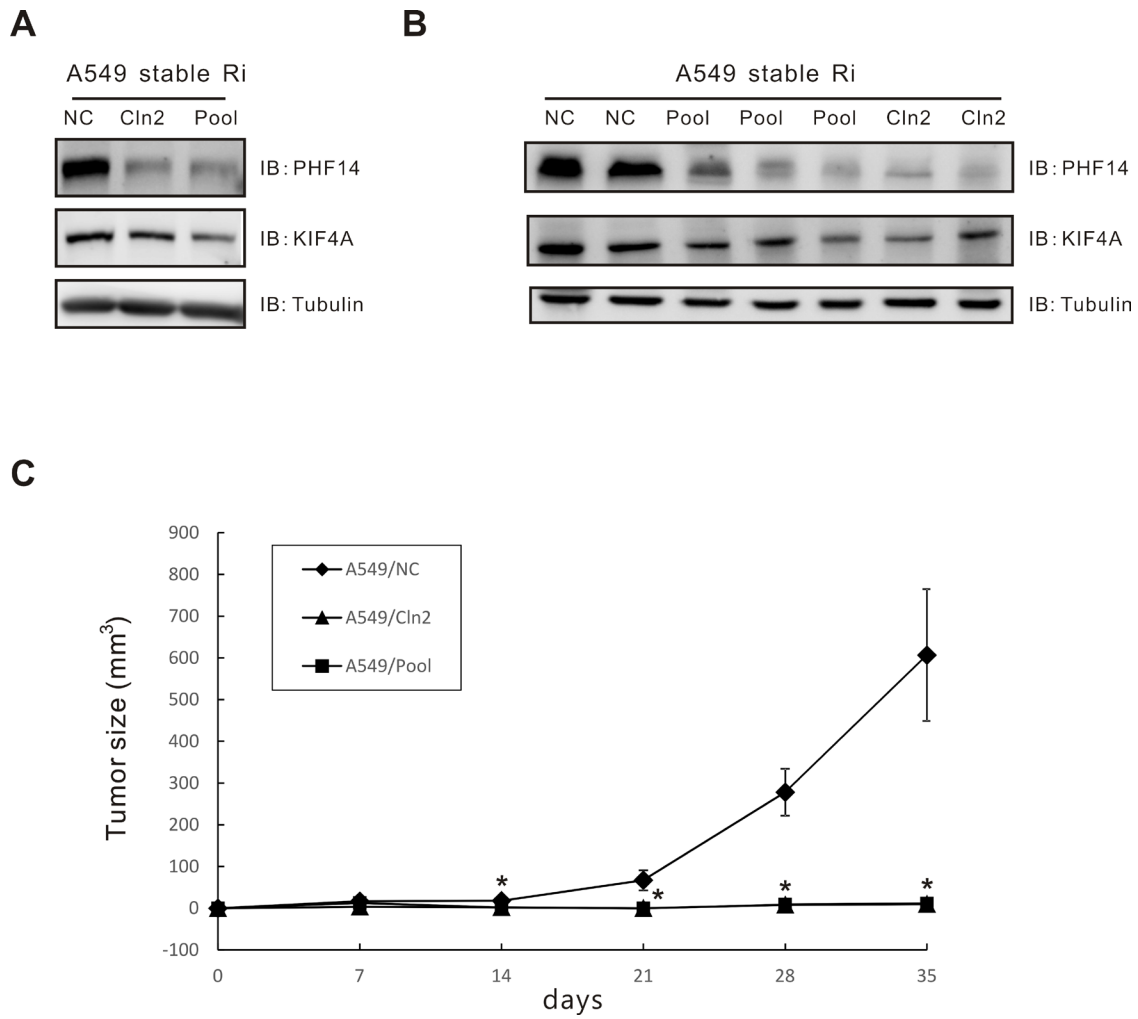

**Supplementary Figure 3: PHF14/KIF4A expression and tumor formation in nude mice.** **A.** PHF14/KIF4A expression in A549 control cells (NC) or PHF14 knockdown-cells (A549/Cln2 or PHF14-knockdown pool cells). **B.** PHF14/KIF4A expression in A549 NC, Cln2 or pool cells - formed tumors six weeks after inoculation. **C.** Average tumor size in the mice injected with different cells as indicated. The mean value  $\pm$  s.d. was calculated from 4-6 samples in each group. \*  $P < 0.05$ .

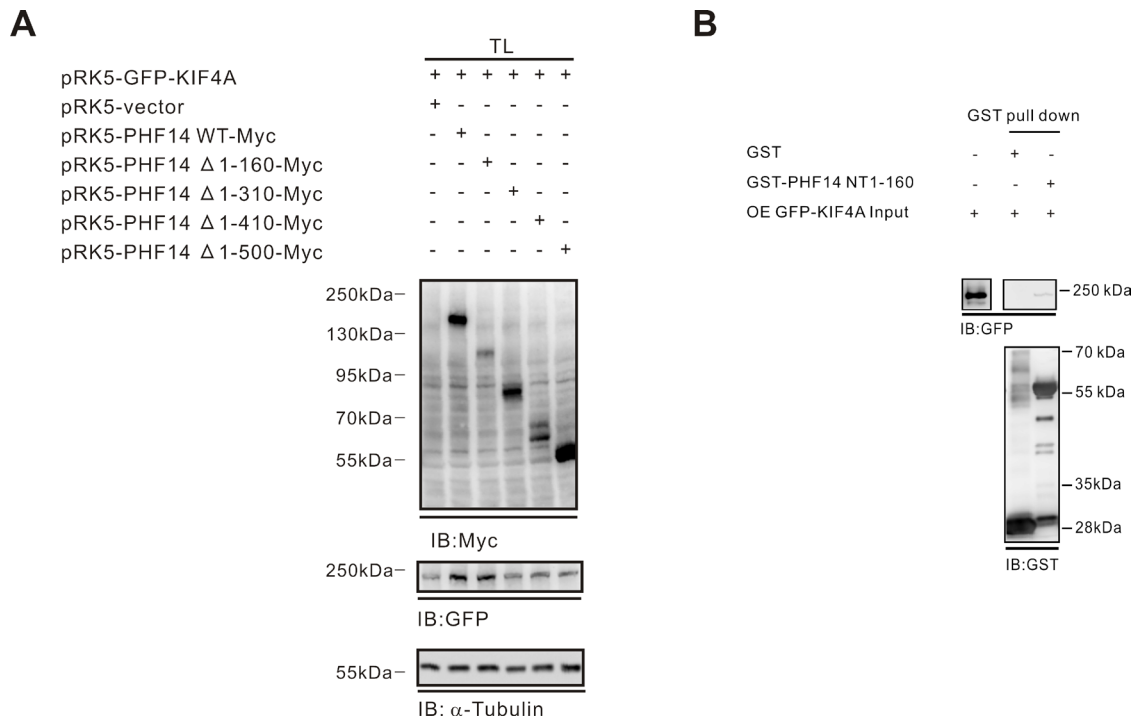

**Supplementary Figure 4: PHF14 interacts with KIF4.** **A.** Co-overexpression of myc-tagged PHF14 or its mutants with GFP-tagged WT KIF4A. Different constructs were transfected into the HCT-116 cells. The exogenous PHF14 and KIF4A were detected using an anti-Myc/anti-GFP antibody respectively.  $\alpha$ -Tubulin was used as the loading control. **B.** GST pull-down assay. Purified GST-tagged fragments were incubated with 293T cell lysates containing GFP-tagged KIF4A WT.

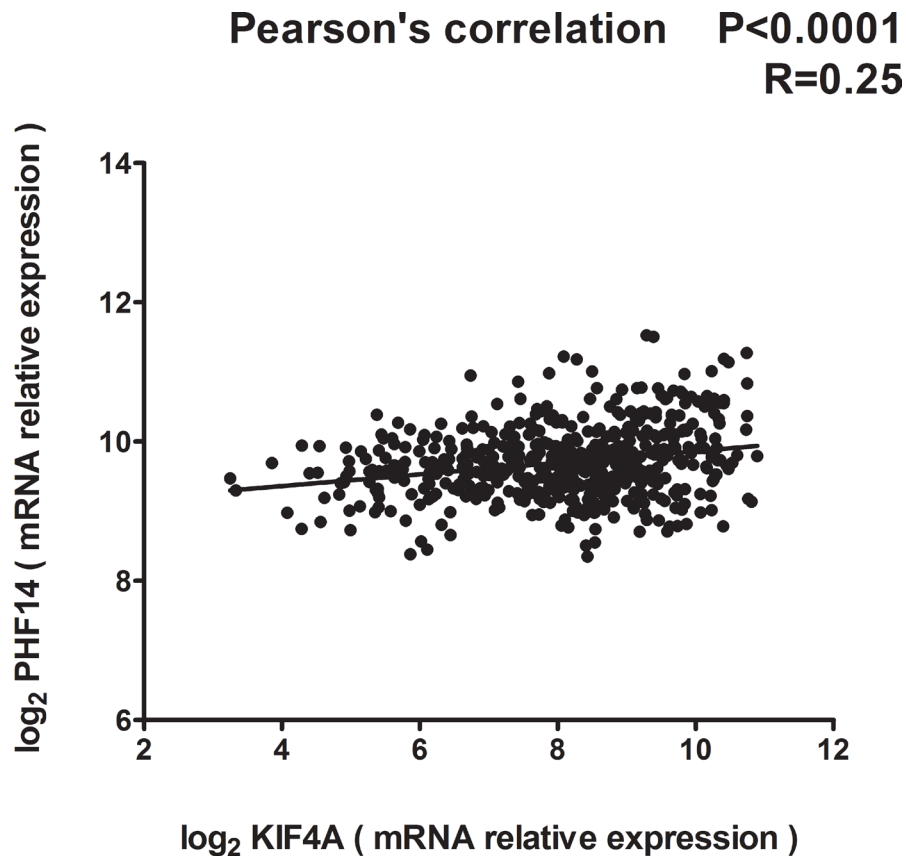

**Supplementary Figure 5: PHF14 co-overexpressed with KIF4A.** The correlation between PHF14 and KIF4A mRNA expression levels in paired NSCLC samples. RNAseq gene expression profiles were retrieved from TCGA database,  $n=516$ ,  $R=0.246$ ,  $P < 0.0001$ .

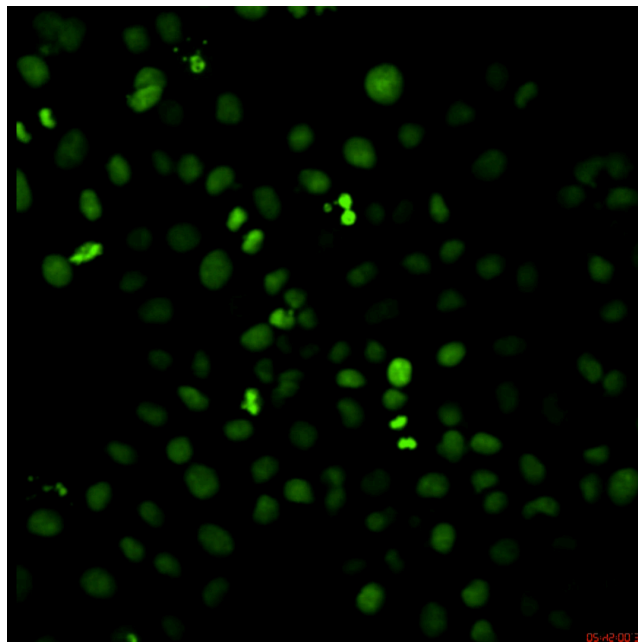

**Supplementary Movie 1: Control HeLa cells undergoing mitosis.** HeLa cells stably expressing histone H<sub>2</sub>B-GFP (green) and transfected with control siRNA. Images were captured every 5 min for about 12h.

See Supplementary Movie 1

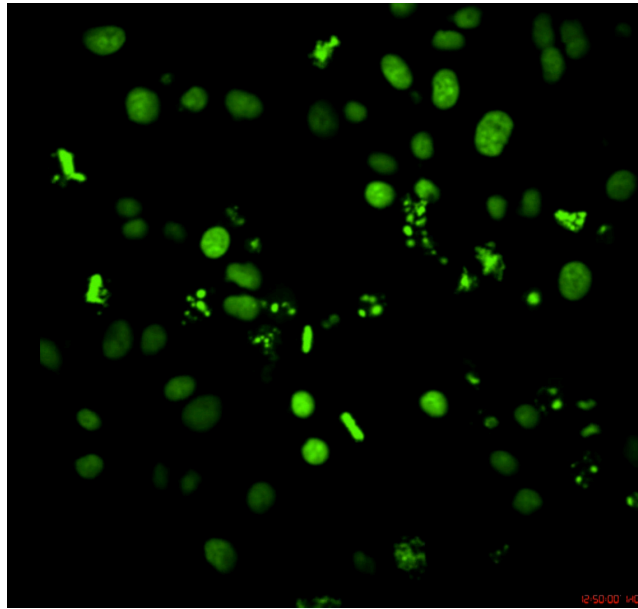

**Supplementary Movie 2: Abnormal mitosis in PHF14-knockdown cell.** HeLa cells stably expressing histone H<sub>2</sub>B-GFP (green) were transfected with siRNA targeting PHF14. Images were captured every 5 min for about 12h.

See Supplementary Movie 2



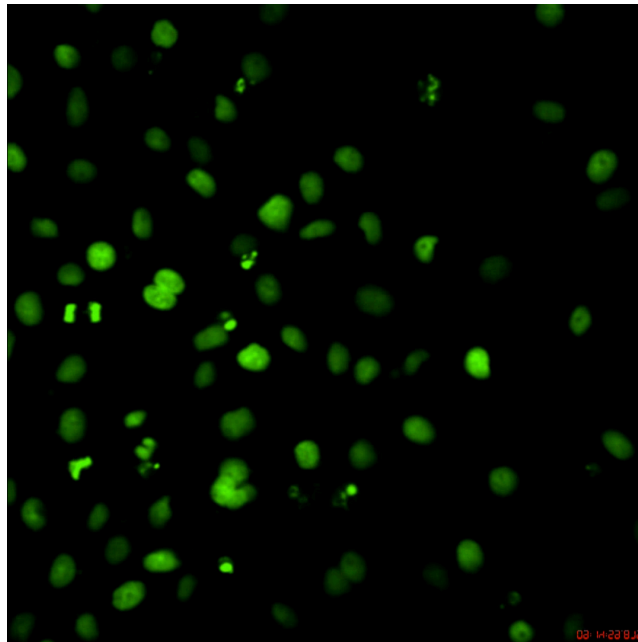

**Supplementary Movie 3: Abnormal mitosis in KIF4A-knockdown cell.** HeLa cells stably expressing histone H<sub>2</sub>B-GFP (green) were transfected with siRNA targeting KIF4A. Images were captured every 5 min for about 12h.

See Supplementary Movie 3

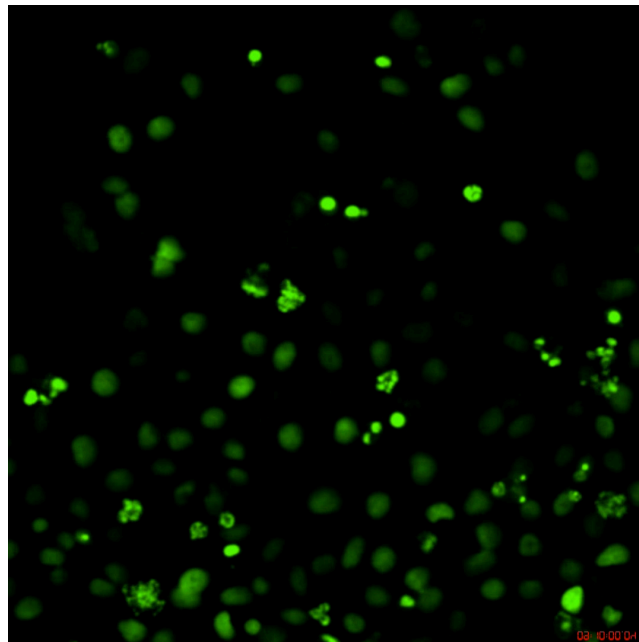

**Supplementary Movie 4: Abnormal mitosis in PHF14/KIF4A double-knockdown cell.** HeLa cells stably expressing histone H<sub>2</sub>B-GFP (green) were transfected with siRNA targeting PHF14 and KIF4A. Images were captured every 5 min for about 12h.

See Supplementary Movie 4

**Supplementary Table 1: Mutations of PHF14 detected in lung squamous cell carcinoma and lung adenocarcinoma from TCGA dataset**

| Disease Type                 | Participants ID | Gene Name | Sample Name                  | CDS Mutation | AA Mutation | domain location      |
|------------------------------|-----------------|-----------|------------------------------|--------------|-------------|----------------------|
| Lung Squamous Cell Carcinoma | TCGA-33-4532    | PHF14     | TCGA-33-4532-01A-01D-1267-08 | c.2030G>A    | p.S677N     | CC2                  |
| Lung Squamous Cell Carcinoma | TCGA-34-5239    | PHF14     | TCGA-34-5239-01A-21D-1817-08 | c.2313-6A>T  | p.?         | PHD3                 |
| Lung Adenocarcinoma          | TCGA-44-2656    | PHF14     | TCGA-44-2656-01A-02D-0969-08 | c.202G>T     | p.E68*      | before CC domain1    |
| Lung Adenocarcinoma          | TCGA-44-2656    | PHF14     | TCGA-44-2656-01A-02D-0969-08 | c.1437A>T    | p.S479S     | PHD2                 |
| Lung Adenocarcinoma          | TCGA-44-2659    | PHF14     | TCGA-44-2659-01A-01D-0969-08 | c.1373G>T    | p.C458F     | PHD2                 |
| Lung Squamous Cell Carcinoma | TCGA-46-3769    | PHF14     | TCGA-46-3769-01A-01D-0983-08 | c.205G>T     | p.E69*      | before CC domain1    |
| Lung Squamous Cell Carcinoma | TCGA-46-3769    | PHF14     | TCGA-46-3769-01A-01D-0983-08 | c.2004A>G    | p.L668L     | CC2                  |
| Lung Adenocarcinoma          | TCGA-49-6742    | PHF14     | TCGA-49-6742-01A-11D-1855-08 | c.1342C>T    | p.R448C     | PHD2                 |
| Lung Adenocarcinoma          | TCGA-50-6590    | PHF14     | TCGA-50-6590-01A-12D-1855-08 | c.1318G>T    | p.E440*     | PHD2                 |
| Lung Squamous Cell Carcinoma | TCGA-66-2758    | PHF14     | TCGA-66-2758-01A-02D-1522-08 | c.1520A>G    | p.K507R     | between PHD2 and CC2 |
| Lung Adenocarcinoma          | TCGA-67-3771    | PHF14     | TCGA-67-3771-01A-01W-0928-08 | c.881C>T     | p.S294F     | between CC1 and PHD1 |

**Supplementary Table 2: Mutations of PHF14 detected in lung adenocarcinoma**

| <b>Disease Type</b> | <b>Gene Name</b> | <b>Sample Name</b> | <b>CDS Mutation</b> | <b>AA Mutation</b> | <b>domain location</b> |
|---------------------|------------------|--------------------|---------------------|--------------------|------------------------|
| Lung Adenocarcinoma | PHF14            | 136                | c.1718C>T           | p.L569F            | between PHD2 and CC2   |
| Lung Adenocarcinoma | PHF14            | 203                | c.1818C>T           | p.S602F            | between PHD2 and CC2   |
| Lung Adenocarcinoma | PHF14            | 1516               | c.1818C>T           | p.S602F            | between PHD2 and CC2   |
| Lung Adenocarcinoma | PHF14            | 1574               | c.1818C>T           | p.S602F            | between PHD2 and CC2   |
| Lung Adenocarcinoma | PHF14            | 1165               | c.2797ATG>TGA       | p.MK928NE          | after PHD4             |
